# Supplementary material
Source: publisher figshare collection journal article supplement (https://sage.figshare.com/ndownloader/files/17722589)
Supplement: Supplementary file 1 [file 17722589]

# SAGE AUTHORSHIP CHANGE REQUEST

## INSTRUCTIONS:

Please print and complete all sections of this form. We require that all authors (including current co-authors, those to be added and those to be removed) sign the relevant sections below. Once complete, please email the form back to sender.

## SECTION ONE: PAPER INFORMATION

|                                                                           |                                    |                      |
|---------------------------------------------------------------------------|------------------------------------|----------------------|
| JOURNAL NAME                                                              | Journal of Engineering in Medicine |                      |
| PAPER TITLE                                                               |                                    | MANUSCRIPT ID NUMBER |
| Machinability of enamel under grinding process using diamond dental burrs |                                    | JOEIM-18-0226        |

## SECTION TWO: ESSENTIAL CONDITIONS FOR CHANGE

The new author list should contain only those who can legitimately claim authorship. This is all those who:

- 1) Have made a substantial contribution to the concept and design, acquisition of data or analysis and interpretation of data; AND
- 2) Drafted the article or revised it critically for important intellectual content; AND
- 3) Approved the version to be published.

NB: Registered authors should meet the conditions of all of the points above. All contributors who do not meet the criteria for authorship should instead be listed in an 'Acknowledgements' section.

## SECTION THREE: REASON FOR AUTHORSHIP CHANGE

Please provide a detailed explanation for the change in authors in the box below.

Mr. Zeng serves as a member of the Science and Technology Planning Project of Guangdong Province (Grant Number 2017B090913005). In the process of analyzing the influence of NC machining system on surface quality of machined surface, he gave me some helpful advices which allowed me to illustrate the experiment results in a more scientific way. He also gave much help in financial support for this project. Thus, I believe we should add him to the co-author list.



#### SECTION FOUR: AUTHOR DECLARATIONS

We agree to the proposed change of authorship to the above paper. NB: all authors (added and removed) must sign below

**DECLARATION:** All the below listed authors agree that they can claim authorship to the submitted paper as they meet the criteria of the points listed in SECTION TWO.

| List of existing and proposed new authors to sign. Please sign, indicating your agreement to the proposed change. The individuals listed below will each be credited as authors in the published paper. (Please add additional rows if required.) |                  |           |
|---------------------------------------------------------------------------------------------------------------------------------------------------------------------------------------------------------------------------------------------------|------------------|-----------|
| Author name                                                                                                                                                                                                                                       | Author signature | Date      |
| Quanzhou Li                                                                                                                                                                                                                                       | Quanzhou Li      | 2019.5.27 |
| Chengyong Wang                                                                                                                                                                                                                                    | Chengyong Wang   | 2019.5.27 |
| Lijuan Zheng                                                                                                                                                                                                                                      | Lijuan Zheng     | 2019.5.27 |
| Danna Zhao                                                                                                                                                                                                                                        | Danna Zhao       | 2019.5.27 |
| Chaofeng Zeng                                                                                                                                                                                                                                     | Chaofeng Zeng    | 2019.5.27 |

**DECLARATION:** All the below listed authors agree that they cannot claim authorship to the submitted paper as they do not (or no longer) meet the criteria of the points listed in SECTION TWO.

| List of removed authors. Please sign, indicating your agreement to be removed from the list of registered authors. The individuals listed below will not be credited as authors in the published paper. (Please add additional rows if required.) |                  |      |
|---------------------------------------------------------------------------------------------------------------------------------------------------------------------------------------------------------------------------------------------------|------------------|------|
| Author name                                                                                                                                                                                                                                       | Author signature | Date |
|                                                                                                                                                                                                                                                   |                  |      |
|                                                                                                                                                                                                                                                   |                  |      |
|                                                                                                                                                                                                                                                   |                  |      |
